# Supplementary material
Source: PubMed Central journal article supplement (PMC3281630)
Supplement: supp_M111.323113_jbc.M111.323113-1.pdf [file supp_M111.323113_jbc.M111.323113-1.pdf]

## SUPPLEMENTAL DATA

### THE MOLECULAR MECHANISM OF 14-3-3-MEDIATED INHIBITION OF PLANT NITRATE REDUCTASE

**Iris C. Lambeck<sup>1\*</sup>, Katrin Fischer-Schrader<sup>1\*</sup>, Dimitri Niks<sup>2</sup>, Juliane Roeper<sup>1</sup>, Jen-Chih Chi<sup>1</sup>,  
Russ Hille<sup>2</sup>, and Guenter Schwarz<sup>1</sup>**

From <sup>1</sup>Institute of Biochemistry, Department of Chemistry and Center for Molecular Medicine, University of Cologne, 50674 Cologne, Germany; and <sup>2</sup>Department of Biochemistry, University of California, Riverside, USA

\*These authors equally contributed to the work

Address correspondence to: Guenter Schwarz, Zuelpicher Str. 47, 50674 Cologne, Germany, +49 221 470 6441, Fax: +49 221 470 5092, E-mail: [gschwarz@uni-koeln.de](mailto:gschwarz@uni-koeln.de); Russ Hille, Department of Biochemistry, 1463 Boyce Hall, University of California, Riverside, CA92521-0122, Phone: +1 951 827 6354, Fax: +1 951 827 3719, E-mail: [russ.hille@ucr.edu](mailto:russ.hille@ucr.edu)

#### EXPERIMENTAL PROCEDURES

*Determination of reduction potentials*- Reduction potentials for the heme site in the presence and absence of phosphorylation/14-3-3 $\omega$  were determined using the method described by Massey (1) at approximately 22°C in assay buffer. Briefly, the fragment to be investigated at a concentration of 5-10  $\mu$ M and in the presence of an equal concentration of an appropriate dye of known reduction potential (indigo carmine, -116 mV at 20-25°C (2)), 200  $\mu$ M xanthine, and 2  $\mu$ M methyl viologen as mediator were made anaerobic in a tonometer as described before, with a stock solution of xanthine oxidase sufficient to give a final concentration of 10-20 nM in the sidearm. The spectrum of the oxidized mixture was recorded, after which the xanthine oxidase solution was tipped in and spectra recorded using a Hewlett-Packard diode array spectrophotometer in the kinetics mode for 2-4 hours monitoring at 425 nm (for heme) and 630 nm (for the dye) as the fragment and dye were slowly reduced by the xanthine/xanthine oxidase mixture. A fully reduced spectrum of the mixture was obtained when the reaction was deemed nearly completed by introduction of a small amount of a concentrated solution of sodium dithionite. The reduction potential for the heme was determined from the y-intercept of plots of the log ox/red of normalized dye vs. that of heme according to the following form of the Nernst equation,  $E_h = E_m + (2.303 RT/nF) \cdot \log([\text{oxidized form}] / [\text{reduced form}])$ , where  $E_h$  is the calculated redox potential,  $E_m$  is the reduction potential of the known dye, and  $n$  is the number of electrons involved in the electron transfer (Figure S1).

*Immunoblots*- Recombinant NR and phosphorylated NR variants (15  $\mu$ mol each) were separated via 12% or 8% SDS-polyacrylamide gel electrophoresis and electrophoretically transferred to polyvinylidene difluoride membranes. The membranes were incubated in blocking buffer (5% (w/v) milk in 50 mM Tris, 150 mM NaCl, 0.05 % Tween 20) at room temperature for 1 h. For detection of His<sub>6</sub>-tagged proteins, Ni-nitrilo-triacetic acid alkaline phosphatase conjugate (Qiagen) was used in a dilution of 1:1000 in 50 mM Tris, 150 mM NaCl, 0.05 % Tween 20 and incubated for 1 h at room temperature. Afterward, the membranes were developed using 5-bromo-4-chloro-3-indolyl phosphate and nitro-blue tetrazolium chloride (AppliChem) as substrates.

Detection of phosphorylated protein was performed using a polyclonal antibody from rabbit directed against a peptide (residues 529-541) including phospho-Ser534 (Eurogentec) in a dilution of 1:25000 and incubated for 1 h at room temperature. As secondary antibody anti-rabbit IgG alkaline phosphatase conjugate (Sigma) (dilution 1:20000) was used with similar incubation conditions before the membranes were developed (Figure S2).

**SUPPLEMENTAL TABLE**

**Table S1: Steady-state kinetic parameters.**

| <b>sample</b>                           | $K_M^{\text{nitrate}}$ [ $\mu\text{M}$ ] | $K_M^{\text{NADH}}$ [ $\mu\text{M}$ ] | $k_{\text{cat}}$ [ $\text{s}^{-1}$ ] |
|-----------------------------------------|------------------------------------------|---------------------------------------|--------------------------------------|
| holo-NR, untreated <sup>1</sup>         | 160 ± 13                                 | -                                     | 34 ± 1                               |
| holo-NR in 35% glycerol <sup>1</sup>    | 77 ± 17                                  | -                                     | 12 ± 1                               |
| Mo-heme, untreated <sup>1</sup>         | 164 ± 31                                 | -                                     | 35 ± 2                               |
| Mo-heme in 35% glycerol <sup>1</sup>    | 65 ± 22                                  | -                                     | 12 ± 1                               |
| Heme-FAD, untreated <sup>2</sup>        |                                          | 20 ± 5                                | 58 ± 6                               |
| Heme-FAD, in 35 % glycerol <sup>2</sup> |                                          | 14 ± 6                                | 57 ± 8                               |

<sup>1</sup> measured with methyl viologen:nitrate assay; <sup>2</sup> measured with NADH:cytochrome *c* assay

SUPPLEMENTAL FIGURES

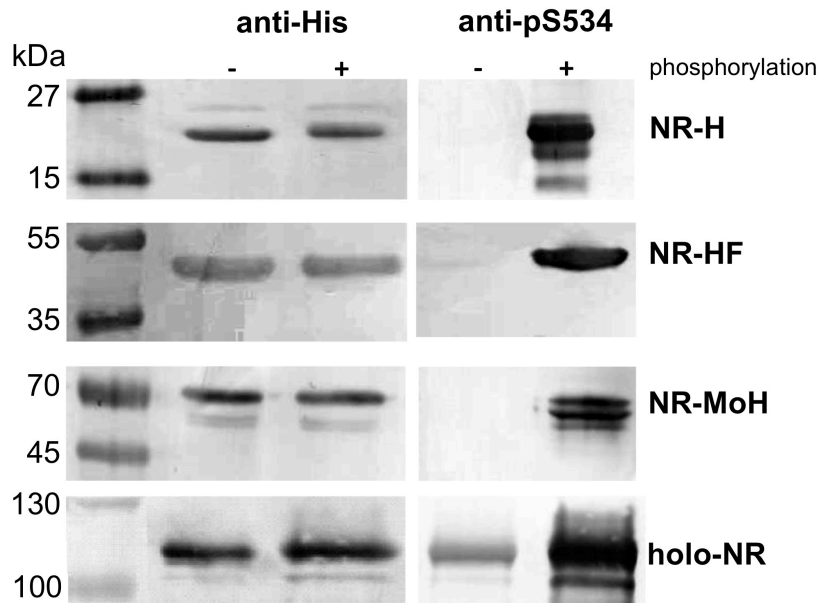

Fig. S1: Immunoblots of NR variants using anti-His or anti-pSer534 antibodies. All fragments used in this work were applied directly (= untreated) or after phosphorylation (indicated with - or +) to SDS-PAGE and separated. One sample was then subjected to immuno-staining using the anti-His<sub>6</sub> conjugate or an antibody specifically against the phosphorylated Ser534 region demonstrating that all fragments were phosphorylated. Only holo-NR displays a phospho-signal before phosphorylation treatment that is due to intrinsic phosphorylation during expression in *Pichia pastoris*. Protein sizes of the used standard proteins are labeled on the left.

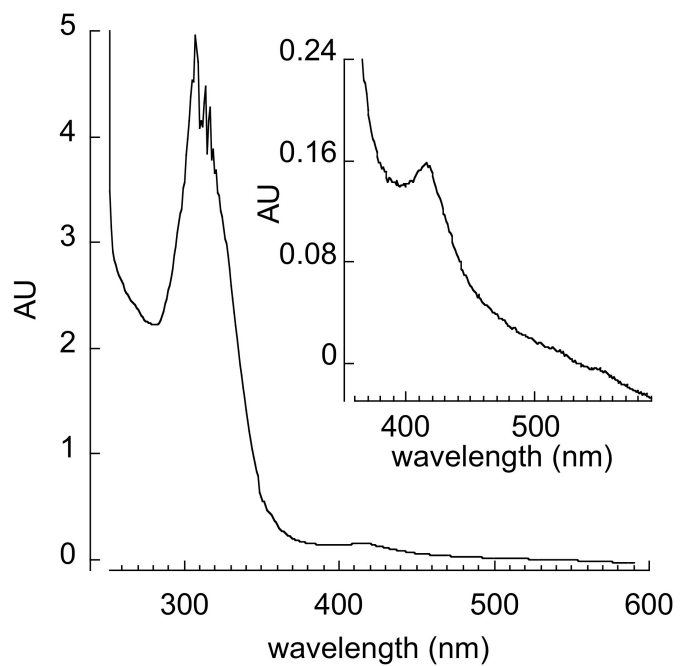

Fig. S2: uv/visible spectrum of 41  $\mu\text{M}$  purified Mo-heme His600Ala variant. The inset shows the presence of trace amounts of heme.

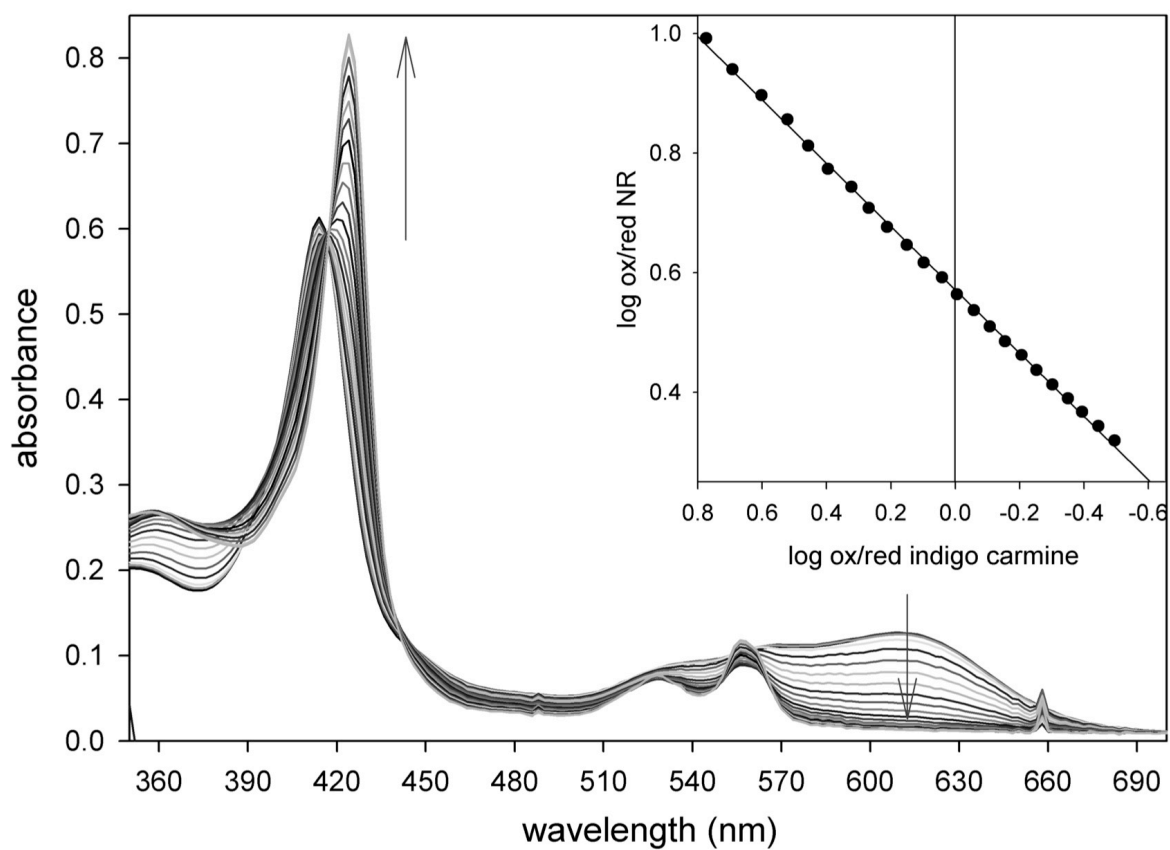

Fig. S3: Representative plot of redox potential determination. Slow reduction of 5  $\mu\text{M}$  heme/5  $\mu\text{M}$  of indigo carmine by the xanthine/xanthine oxidase mixture. The reduction potential for the heme was determined from the y-intercept of the plot of the log ox/red of the dye vs. that of the heme (inset).



### Supporting References

1. Massey, V. (1991) *Flavins and Flavoproteins 1990*, 59-66
2. Guengerich, F. P., Ballou, D. P., and Coon, M. J. (1975) *J Biol Chem* **250**, 7405-7414
